# Supplementary material for: Breast Cancer Risk and Breast-Cancer-Specific Mortality following Risk-Reducing Salpingo-Oophorectomy in BRCA Carriers: A Systematic Review and Meta-Analysis
Source: MDPI journal article supplement (doi:10.3390/cancers15051625), 2023-03-06
Supplement: s1 [file s1]

**Table S1.** Search strategy for literature search.

|                                                                                                                          |                                                                                                                                                                                                                                                                                                                                                   |
|--------------------------------------------------------------------------------------------------------------------------|---------------------------------------------------------------------------------------------------------------------------------------------------------------------------------------------------------------------------------------------------------------------------------------------------------------------------------------------------|
| <b>Eligibility criteria</b>                                                                                              | Participants: BRCA1/BRCA2 mutation carriers                                                                                                                                                                                                                                                                                                       |
|                                                                                                                          | Intervention: RRSO                                                                                                                                                                                                                                                                                                                                |
|                                                                                                                          | Comparison: No RRSO                                                                                                                                                                                                                                                                                                                               |
|                                                                                                                          | Outcomes: PBC risk, CBC risk, BC specific mortality                                                                                                                                                                                                                                                                                               |
| <b>Data sources</b>                                                                                                      | MEDLINE (1946 to 2022), EMBASE (1974 to 2022), Pubmed (1996 to 2022), CINAHL (1937 to 2022), PsychINFO (1806 to 2022), PROSPERO (2011 to 2022), Cochrane (1999 to 2022), citation searching, specialist journals, grey literature (conference proceedings/Google search), clinical trial registries (ISRCTN registry/ClinicalTrials.gov registry) |
|                                                                                                                          |                                                                                                                                                                                                                                                                                                                                                   |
| <b>Search strategy for database searching</b>                                                                            |                                                                                                                                                                                                                                                                                                                                                   |
| 1.                                                                                                                       | (BRCA).ti,ab                                                                                                                                                                                                                                                                                                                                      |
| 2.                                                                                                                       | exp "BRCA"/                                                                                                                                                                                                                                                                                                                                       |
| 3.                                                                                                                       | (BRCA AND "1 OR 2").ti,ab                                                                                                                                                                                                                                                                                                                         |
| 4.                                                                                                                       | exp "BRCA AND 1 OR 2"/                                                                                                                                                                                                                                                                                                                            |
| 5.                                                                                                                       | (BRCA AND 1).ti,ab                                                                                                                                                                                                                                                                                                                                |
| 6.                                                                                                                       | exp "BRCA AND 1"/                                                                                                                                                                                                                                                                                                                                 |
| 7.                                                                                                                       | (BRCA AND 2).ti,ab                                                                                                                                                                                                                                                                                                                                |
| 8.                                                                                                                       | 1 OR 2 OR 3 OR 4 OR 5 OR 6 OR 7 OR 8                                                                                                                                                                                                                                                                                                              |
| 9.                                                                                                                       | (OOPHORECTOMY).ti,ab                                                                                                                                                                                                                                                                                                                              |
| 10.                                                                                                                      | exp "OOPHERECTOMY"/                                                                                                                                                                                                                                                                                                                               |
| 11.                                                                                                                      | (OVARIECTOMY).ti,ab                                                                                                                                                                                                                                                                                                                               |
| 12.                                                                                                                      | exp "OVARIECTOMY"/                                                                                                                                                                                                                                                                                                                                |
| 13.                                                                                                                      | (SALPINGECTOMY).ti,ab                                                                                                                                                                                                                                                                                                                             |
| 14.                                                                                                                      | exp "SALPINGECTOMY"/                                                                                                                                                                                                                                                                                                                              |
| 15.                                                                                                                      | (OOPHORECTOMY).ti,ab                                                                                                                                                                                                                                                                                                                              |
| 16.                                                                                                                      | exp "OOPHORECTOMY"/                                                                                                                                                                                                                                                                                                                               |
| 17.                                                                                                                      | (OVARIECTOMY).ti,ab                                                                                                                                                                                                                                                                                                                               |
| 18.                                                                                                                      | exp "OVARIECTOMY"/                                                                                                                                                                                                                                                                                                                                |
| 19.                                                                                                                      | (SALPINGECTOMY).ti,ab                                                                                                                                                                                                                                                                                                                             |
| 20.                                                                                                                      | exp "SALPINGECTOMY"/                                                                                                                                                                                                                                                                                                                              |
| 21.                                                                                                                      | (SALPINGO AND OOPHORECTOMY).ti,ab                                                                                                                                                                                                                                                                                                                 |
| 22.                                                                                                                      | exp "SALPINGO AND OOPHORECTOMY"/                                                                                                                                                                                                                                                                                                                  |
| 23.                                                                                                                      | 9 OR 10 OR 11 OR 12 OR 13 OR 14 OR 15 OR 16 OR 17 OR 18 OR 19 OR 20 OR 21 OR 22                                                                                                                                                                                                                                                                   |
| 24.                                                                                                                      | (BREAST NEOPLASMS).ti,ab                                                                                                                                                                                                                                                                                                                          |
| 25.                                                                                                                      | exp "BREAST NEOPLASMS"/                                                                                                                                                                                                                                                                                                                           |
| 26.                                                                                                                      | (BREAST CANCER).ti,ab                                                                                                                                                                                                                                                                                                                             |
| 27.                                                                                                                      | exp "BREAST CANCER"/                                                                                                                                                                                                                                                                                                                              |
| 28.                                                                                                                      | 24 OR 25 OR 26 OR 27                                                                                                                                                                                                                                                                                                                              |
| 29.                                                                                                                      | 8 AND 23 AND 28                                                                                                                                                                                                                                                                                                                                   |
| RRSO-risk reducing salpingo-oophorectomy, PBC-primary breast cancer, CBC- contralateral breast cancer, BC-breast cancer. |                                                                                                                                                                                                                                                                                                                                                   |
